# Supplementary material for: Influence of Sugar-Sweetened Beverages Intake on Sarcopenic Obesity, Visceral Obesity, and Sarcopenia in Lebanese Patients with MASLD: A Case-Control Study
Source: MDPI journal article supplement (doi:10.3390/healthcare12050591), 2024-03-05
Supplement: s1 [file s1]

**Table S1.** Water and sugary-sweetened beverages consumption among case-control groups.

|                                                                 |                 | <b>Control Group</b> |            | <b>MASLD</b> |            |
|-----------------------------------------------------------------|-----------------|----------------------|------------|--------------|------------|
|                                                                 |                 | <b>N</b>             | <b>(%)</b> | <b>N</b>     | <b>(%)</b> |
| <b>Water</b><br>Frequency                                       | < 1 per /week   | 1                    | (1.7)      | 2            | (3.3)      |
|                                                                 | 1 /week         | 2                    | (3.3)      | 0            | (0.0)      |
|                                                                 | 2 to 3 /week    | 3                    | (5.0)      | 4            | (6.7)      |
|                                                                 | 4 to 6 /week    | 3                    | (5.0)      | 2            | (3.3)      |
|                                                                 | 1 /day          | 3                    | (5.0)      | 2            | (3.3)      |
|                                                                 | At least 2 /day | 5                    | (8.3)      | 2            | (3.3)      |
|                                                                 | At least 3 /day | 43                   | (71.7)     | 48           | (80.0)     |
| <b>Water</b><br>Quantity<br>(based on<br>dietary<br>guidelines) | Insufficient    | 26                   | (43.3)     | 25           | (41.7)     |
|                                                                 | Sufficient      | 34                   | (56.7)     | 35           | (58.3)     |
| <b>100% Fruit</b><br><b>juice</b><br>Frequency                  | < 1 per /week   | 39                   | (65.0)     | 38           | (63.3)     |
|                                                                 | 1 /week         | 4                    | (6.7)      | 3            | (5.0)      |
|                                                                 | 2 to 3 /week    | 11                   | (18.3)     | 14           | (23.3)     |
|                                                                 | 4 to 6 /week    | 4                    | (6.7)      | 1            | (1.7)      |
|                                                                 | 1 /day          | 1                    | (1.7)      | 3            | (5.0)      |
|                                                                 | At least 2 /day | 1                    | (1.7)      | 0            | (0.0)      |
|                                                                 | At least 3 /day | 0                    | (0.0)      | 1            | (1.7)      |
| <b>100% Fruit</b><br><b>juice</b> Quantity                      | 0               | 30                   | (50.0)     | 29           | (48.3)     |
|                                                                 | 3/4 cup         | 0                    | (0.0)      | 0            | (0.0)      |
|                                                                 | 1 cup           | 27                   | (45.0)     | 26           | (43.3)     |
|                                                                 | 1/2 cup         | 0                    | (0.0)      | 3            | (5.0)      |
|                                                                 | 2 cups          | 1                    | (1.7)      | 1            | (1.7)      |
|                                                                 | 2 1/2 cup       | 2                    | (3.3)      | 1            | (1.7)      |
|                                                                 | 3 cups          | 0                    | (0.0)      | 0            | (0.0)      |
| <b>Sweet Juice</b><br>Frequency                                 | < 1 per /week   | 48                   | (80.0)     | 47           | (78.3)     |
|                                                                 | 1 /week         | 5                    | (8.3)      | 5            | (8.3)      |
|                                                                 | 2 to 3 /week    | 3                    | (5.0)      | 5            | (8.3)      |
|                                                                 | 4 to 6 /week    | 0                    | (0.0)      | 3            | (5.0)      |
|                                                                 | 1 /day          | 2                    | (3.3)      | 0            | (0.0)      |
|                                                                 | At least 2 /day | 0                    | (0.0)      | 0            | (0.0)      |
|                                                                 | At least 3 /day | 2                    | (3.3)      | 0            | (0.0)      |
| <b>Sweet Juice</b><br>Quantity                                  | 0               | 53                   | (88.3)     | 52           | (86.7)     |
|                                                                 | 1 cup           | 4                    | (6.7)      | 5            | (8.3)      |

|                                                     |                 |           |           |
|-----------------------------------------------------|-----------------|-----------|-----------|
|                                                     | 2 cups          | 1 (1.7)   | 1 (1.7)   |
|                                                     | 4 cups          | 0 (0.0)   | 2 (3.3)   |
|                                                     | 6 cups          | 2 (3.3)   | 0 (0.0)   |
| <b>Whole fat Milk</b><br>Frequency                  | < 1 per /week   | 48 (80.0) | 50 (83.3) |
|                                                     | 1 /week         | 0 (0.0)   | 3 (5.0)   |
|                                                     | 2 to 3 /week    | 6 (10.0)  | 2 (3.3)   |
|                                                     | 4 to 6 /week    | 2 (3.3)   | 2 (3.3)   |
|                                                     | 1 /day          | 0 (0.0)   | 2 (3.3)   |
|                                                     | At least 2 /day | 0 (0.0)   | 0 (0.0)   |
|                                                     | At least 3 /day | 4 (6.7)   | 1 (1.7)   |
| <b>Whole fat</b><br><b>Milk</b> Quantity            | 0               | 38 (63.3) | 38 (63.3) |
|                                                     | 3/4 cup         | 1 (1.7)   | 2 (3.3)   |
|                                                     | 1 cup           | 20 (33.3) | 17 (28.3) |
|                                                     | 1/2 cup         | 0 (0.0)   | 1 (1.7)   |
|                                                     | 2 cups          | 1 (1.7)   | 2 (3.3)   |
|                                                     | 2 1/2 cup       | 0 (0.0)   | 0 (0.0)   |
| <b>Reduced Milk</b><br>Frequency                    | < 1 per /week   | 56 (93.3) | 57 (95.0) |
|                                                     | 1 /week         | 1 (1.7)   | 1 (1.7)   |
|                                                     | 2 to 3 /week    | 2 (3.3)   | 0 (0.0)   |
|                                                     | 4 to 6 /week    | 0 (0.0)   | 0 (0.0)   |
|                                                     | 1 /day          | 1 (1.7)   | 2 (3.3)   |
|                                                     | At least 2 /day | 0 (0.0)   | 0 (0.0)   |
|                                                     | At least 3 /day | 0 (0.0)   | 0 (0.0)   |
| <b>Reduced Milk</b><br>Quantity                     | 0               | 56 (93.3) | 56 (93.3) |
|                                                     | 3/4 cup         | 0 (0.0)   | 2 (3.3)   |
|                                                     | 1 cup           | 4 (6.7)   | 2 (3.3)   |
|                                                     | 1/2 cup         | 0 (0.0)   | 0 (0.0)   |
|                                                     | 2 cups          | 0 (0.0)   | 0 (0.0)   |
|                                                     | 2 1/2 cup       | 0 (0.0)   | 0 (0.0)   |
| <b>Low fat-free</b><br><b>fat Milk</b><br>Frequency | < 1 per /week   | 56 (93.3) | 58 (96.7) |
|                                                     | 1 /week         | 1 (1.7)   | 0 (0.0)   |
|                                                     | 2 to 3 /week    | 2 (3.3)   | 1 (1.7)   |
|                                                     | 4 to 6 /week    | 0 (0.0)   | 0 (0.0)   |
|                                                     | 1 /day          | 0 (0.0)   | 1 (1.7)   |
|                                                     | At least 2 /day | 0 (0.0)   | 0 (0.0)   |
|                                                     | At least 3 /day | 1 (1.7)   | 0 (0.0)   |
| <b>Low fat-free</b><br><b>fat Milk</b><br>Quantity  | 0               | 54 (90.0) | 56 (93.3) |
|                                                     | 3/4 cup         | 0 (0.0)   | 2 (3.3)   |
|                                                     | 1 cup           | 5 (8.3)   | 2 (3.3)   |

|                                                               |                 |           |           |
|---------------------------------------------------------------|-----------------|-----------|-----------|
|                                                               | 1/2 cup         | 0 (0.0)   | 0 (0.0)   |
|                                                               | 2 cups          | 0 (0.0)   | 0 (0.0)   |
|                                                               | 2 1/2 cup       | 1 (1.7)   | 0 (0.0)   |
| <b>Regular soft Drink</b><br>Frequency                        | < 1 per /week   | 46 (76.7) | 41 (68.3) |
|                                                               | 1 /week         | 4 (6.7)   | 6 (10.0)  |
|                                                               | 2 to 3 /week    | 2 (3.3)   | 4 (6.7)   |
|                                                               | 4 to 6 /week    | 2 (3.3)   | 6 (10.0)  |
|                                                               | 1 /day          | 1 (1.7)   | 1 (1.7)   |
|                                                               | At least 2 /day | 1 (1.7)   | 0 (0.0)   |
|                                                               | At least 3 /day | 4 (6.7)   | 2 (3.3)   |
| <b>Regular soft Drink</b><br>Quantity                         | 0               | 38 (63.3) | 28 (46.7) |
|                                                               | 3/4 cup         | 1 (1.7)   | 2 (3.3)   |
|                                                               | 1 cup           | 14 (23.3) | 21 (35.0) |
|                                                               | 1 1/2 cup       | 1 (1.7)   | 2 (3.3)   |
|                                                               | 2 cups          | 5 (8.3)   | 6 (10.0)  |
|                                                               | 2 1/2 cup       | 1 (1.7)   | 1 (1.7)   |
| <b>Soft drink- Artificially Sweetened (Diet)</b><br>Frequency | < 1 per /week   | 55 (91.7) | 57 (95.0) |
|                                                               | 1 /week         | 2 (3.3)   | 1 (1.7)   |
|                                                               | 2 to 3 /week    | 1 (1.7)   | 1 (1.7)   |
|                                                               | 4 to 6 /week    | 0 (0.0)   | 0 (0.0)   |
|                                                               | 1 /day          | 1 (1.7)   | 0 (0.0)   |
|                                                               | At least 2 /day | 0 (0.0)   | 0 (0.0)   |
|                                                               | At least 3 /day | 1 (1.7)   | 1 (1.7)   |
| <b>Soft drink- Artificially Sweetened (Diet)</b><br>Quantity  | 0               | 53 (88.3) | 56 (93.3) |
|                                                               | 3/4 cup         | 1 (1.7)   | 1 (1.7)   |
|                                                               | 1 cup           | 5 (8.3)   | 2 (3.3)   |
|                                                               | 1 1/2 cup       | 0 (0.0)   | 1 (1.7)   |
|                                                               | 2 cups          | 0 (0.0)   | 0 (0.0)   |
|                                                               | 2 1/2 cup       | 1 (1.7)   | 0 (0.0)   |
| <b>Sweetened Tea</b> Frequency                                | < 1 per /week   | 22 (36.7) | 16 (26.7) |
|                                                               | 1 /week         | 2 (3.3)   | 2 (3.3)   |
|                                                               | 2 to 3 /week    | 2 (3.3)   | 0 (0.0)   |
|                                                               | 4 to 6 /week    | 3 (5.0)   | 2 (3.3)   |
|                                                               | 1 /day          | 5 (8.3)   | 4 (6.7)   |
|                                                               | At least 2 /day | 4 (6.7)   | 1 (1.7)   |
|                                                               | At least 3 /day | 22 (36.7) | 35 (58.3) |
| <b>Sweetened Tea</b> Quantity                                 | 0               | 16 (26.7) | 14 (23.3) |
|                                                               | 3/4 cup         | 0 (0.0)   | 0 (0.0)   |
|                                                               | 1 cup           | 29 (48.3) | 17 (28.3) |

|                                                                              |                 |           |           |
|------------------------------------------------------------------------------|-----------------|-----------|-----------|
|                                                                              | 1/2 cup         | 1 (1.7)   | 0 (0.0)   |
|                                                                              | 2 cups          | 8 (13.3)  | 21 (35.0) |
|                                                                              | 2 1/2 cup       | 6 (10.0)  | 8 (13.3)  |
| <b>Tea or Coffee with cream and/or sugar</b><br>Frequency                    | < 1 per /week   | 40 (66.7) | 37 (61.7) |
|                                                                              | 1 /week         | 0 (0.0)   | 2 (3.3)   |
|                                                                              | 2 to 3 /week    | 1 (1.7)   | 2 (3.3)   |
|                                                                              | 4 to 6 /week    | 1 (1.7)   | 1 (1.7)   |
|                                                                              | 1 /day          | 1 (1.7)   | 0 (0.0)   |
|                                                                              | At least 2 /day | 2 (3.3)   | 1 (1.7)   |
|                                                                              | At least 3 /day | 15 (25.0) | 17 (28.3) |
| <b>Tea or Coffee with cream and/or sugar</b><br>Quantity                     | 0               | 36 (60.0) | 33 (55.0) |
|                                                                              | 3/4 cup         | 2 (3.3)   | 1 (1.7)   |
|                                                                              | 1 cup           | 16 (26.7) | 18 (30.0) |
|                                                                              | 1/2 cup         | 0 (0.0)   | 0 (0.0)   |
|                                                                              | 2 cups          | 5 (8.3)   | 3 (5.0)   |
|                                                                              | 2 1/2 cup       | 1 (1.7)   | 5 (8.3)   |
| <b>Tea or Coffee black with or without artificial sweetener</b><br>Frequency | < 1 per /week   | 35 (58.3) | 22 (36.7) |
|                                                                              | 1 /week         | 0 (0.0)   | 3 (5.0)   |
|                                                                              | 2 to 3 /week    | 1 (1.7)   | 6 (10.0)  |
|                                                                              | 4 to 6 /week    | 1 (1.7)   | 5 (8.3)   |
|                                                                              | 1 /day          | 0 (0.0)   | 1 (1.7)   |
|                                                                              | At least 2 /day | 2 (3.3)   | 0 (0.0)   |
|                                                                              | At least 3 /day | 21 (35.0) | 23 (38.3) |
| <b>Tea or Coffee black with or without artificial sweetener</b><br>Quantity  | 0               | 30 (50.0) | 17 (28.3) |
|                                                                              | 3/4 cup         | 1 (1.7)   | 1 (1.7)   |
|                                                                              | 1 cup           | 12 (20.0) | 18 (30.0) |
|                                                                              | 1/2 cup         | 1 (1.7)   | 0 (0.0)   |
|                                                                              | 2 cups          | 2 (3.3)   | 12 (20.0) |
|                                                                              | 2 1/2 cup       | 14 (23.3) | 12 (20.0) |

**Table S2.** Intake of alcoholic, non-alcoholic beverages, and energy drinks among case-control groups.

|                               |               | <b>Control Group</b> |            | <b>MASLD</b> |            |
|-------------------------------|---------------|----------------------|------------|--------------|------------|
|                               |               | <b>N</b>             | <b>(%)</b> | <b>N</b>     | <b>(%)</b> |
| <b>Beer, Ales, Wine, Non-</b> | < 1 per /week | 60                   | (100.0)    | 57           | (95.0)     |
|                               | 1 /week       | 0                    | (0.0)      | 2            | (3.3)      |
|                               | 2 to 3 /week  | 0                    | (0.0)      | 0            | (0.0)      |

|                                                                               |                 |            |            |
|-------------------------------------------------------------------------------|-----------------|------------|------------|
| <b>alcoholic or<br/>light Beer</b><br>Frequency                               | 4 to 6 /week    | 0 (0.0)    | 0 (0.0)    |
|                                                                               | 1 /day          | 0 (0.0)    | 0 (0.0)    |
|                                                                               | At least 2 /day | 0 (0.0)    | 0 (0.0)    |
|                                                                               | At least 3 /day | 0 (0.0)    | 1 (1.7)    |
| <b>Beer, Ales,<br/>Wine, Non-<br/>alcoholic or<br/>light Beer</b><br>Quantity | 0               | 60 (100.0) | 56 (93.3)  |
|                                                                               | 3/4 cup         | 0 (0.0)    | 2 (3.3)    |
|                                                                               | 1 cup           | 0 (0.0)    | 1 (1.7)    |
|                                                                               | 1/2 cup         | 0 (0.0)    | 1 (1.7)    |
|                                                                               | 2 cups          | 0 (0.0)    | 0 (0.0)    |
|                                                                               | 2 1/2 cup       | 0 (0.0)    | 0 (0.0)    |
| <b>Hard Liquor</b><br>Frequency                                               | < 1 per /week   | 60 (100.0) | 60 (100.0) |
|                                                                               | 1 /week         | 0 (0.0)    | 0 (0.0)    |
|                                                                               | 2 to 3 /week    | 0 (0.0)    | 0 (0.0)    |
|                                                                               | 4 to 6 /week    | 0 (0.0)    | 0 (0.0)    |
|                                                                               | 1 /day          | 0 (0.0)    | 0 (0.0)    |
|                                                                               | At least 2 /day | 0 (0.0)    | 0 (0.0)    |
|                                                                               | At least 3 /day | 0 (0.0)    | 0 (0.0)    |
| <b>Hard Liquor</b><br>Quantity                                                | 0               | 60 (100.0) | 57 (95.0)  |
|                                                                               | 3/4 cup         | 0 (0.0)    | 3 (5.0)    |
|                                                                               | 1 cup           | 0 (0.0)    | 0 (0.0)    |
|                                                                               | 1/2 cup         | 0 (0.0)    | 0 (0.0)    |
|                                                                               | 2 cups          | 0 (0.0)    | 0 (0.0)    |
|                                                                               | 2 1/2 cup       | 0 (0.0)    | 0 (0.0)    |
| <b>Wine<br/>Red/White</b><br>Frequency                                        | < 1 per /week   | 60 (100.0) | 60 (100.0) |
|                                                                               | 1 /week         | 0 (0.0)    | 0 (0.0)    |
|                                                                               | 2 to 3 /week    | 0 (0.0)    | 0 (0.0)    |
|                                                                               | 4 to 6 /week    | 0 (0.0)    | 0 (0.0)    |
|                                                                               | 1 /day          | 0 (0.0)    | 0 (0.0)    |
|                                                                               | At least 2 /day | 0 (0.0)    | 0 (0.0)    |
|                                                                               | At least 3 /day | 0 (0.0)    | 0 (0.0)    |
| <b>Wine<br/>Red/White</b><br>Quantity                                         | 0               | 58 (96.7)  | 57 (95.0)  |
|                                                                               | 3/4 cup         | 2 (3.3)    | 3 (5.0)    |
|                                                                               | 1 cup           | 0 (0.0)    | 0 (0.0)    |
|                                                                               | 1/2 cup         | 0 (0.0)    | 0 (0.0)    |
|                                                                               | 2 cups          | 0 (0.0)    | 0 (0.0)    |
|                                                                               | 2 1/2 cup       | 0 (0.0)    | 0 (0.0)    |
| <b>Energy &amp;<br/>Sports drinks</b><br>Frequency                            | < 1 per /week   | 60 (100.0) | 60 (100.0) |
|                                                                               | 1 /week         | 0 (0.0)    | 0 (0.0)    |
|                                                                               | 2 to 3 /week    | 0 (0.0)    | 0 (0.0)    |

|                                                    |                 |           |           |
|----------------------------------------------------|-----------------|-----------|-----------|
|                                                    | 4 to 6 /week    | 0 (0.0)   | 0 (0.0)   |
|                                                    | 1 /day          | 0 (0.0)   | 0 (0.0)   |
|                                                    | At least 2 /day | 0 (0.0)   | 0 (0.0)   |
|                                                    | At least 3 /day | 0 (0.0)   | 0 (0.0)   |
| <b>Energy &amp;<br/>Sports drinks<br/>Quantity</b> | 0               | 58 (96.7) | 57 (95.0) |
|                                                    | 3/4 cup         | 1 (1.7)   | 3 (5.0)   |
|                                                    | 1 cup           | 0 (0.0)   | 0 (0.0)   |
|                                                    | 1/2 cup         | 0 (0.0)   | 0 (0.0)   |
|                                                    | 2 cups          | 1 (1.7)   | 0 (0.0)   |
|                                                    | 2 1/2 cup       | 0 (0.0)   | 0 (0.0)   |
